# Supplementary material for: Microfluidic fabrication of multiaxial microvessels via hydrodynamic shaping
Source: Royal Society of Chemistry journal article supplement (doi:10.1039/c4ra03667k), 2014-01-01
Supplement: c4ra03667k1.pdf [file c4ra03667k1.pdf]

## Supporting Information

### Microfluidic Fabrication of Multiaxial Microvessels via Hydrodynamic Shaping

Michael A. Daniele <sup>a</sup>, Kathryn Radom <sup>b</sup>, Frances S. Ligler <sup>c</sup> and André A. Adams <sup>a,\*</sup>

<sup>a</sup>Center for Bio/Molecular Science and Engineering, U.S. Naval Research Laboratory, 4555 Overlook Ave. SW, Washington D.C. 20375, USA

<sup>b</sup>Naval Research Enterprise Internship Program, U.S. Naval Research Laboratory, 4555 Overlook Ave. SW, Washington D.C. 20375, USA

<sup>c</sup>Department of Biomedical Engineering, University of North Carolina and North Carolina State University, Raleigh, North Carolina 27695, USA

\*Author to whom correspondence should be addressed; e-mail: [andre.adams@nrl.navy.mil](mailto:andre.adams@nrl.navy.mil)

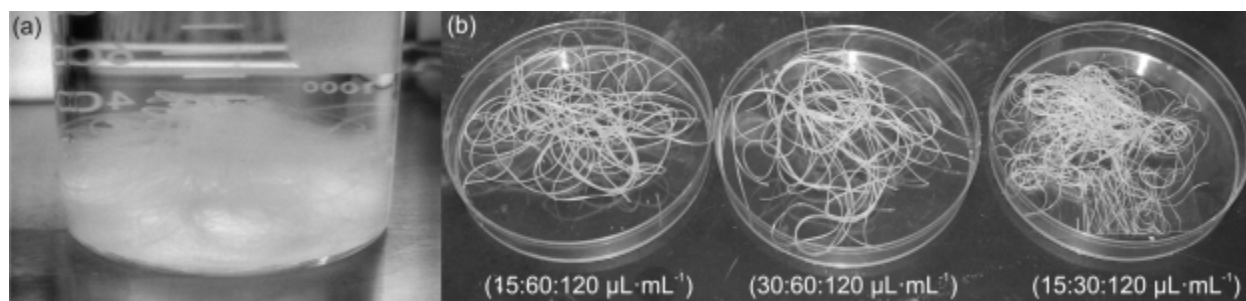

**Figure S1.** Representative photographs of microvessels illustrating the continuous production of meter-length microvessels. (a) A single, as-produced hollow microtube in its collection bath. (b) Multiple lyophilized hollow microtubes produced from adjusted flow rates.

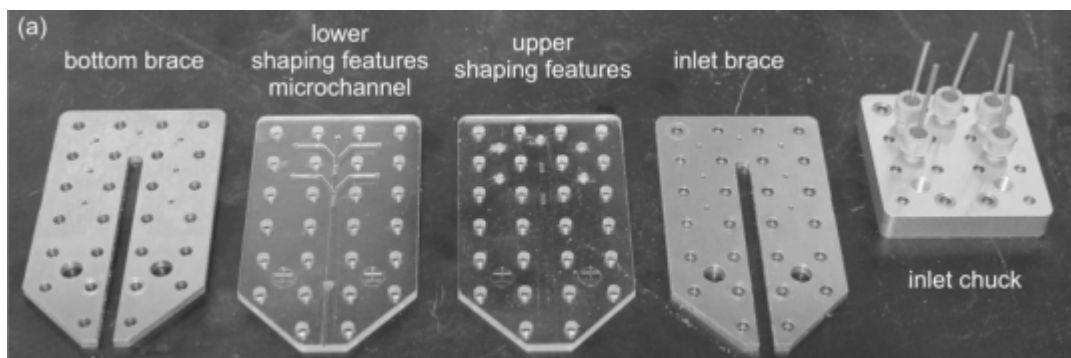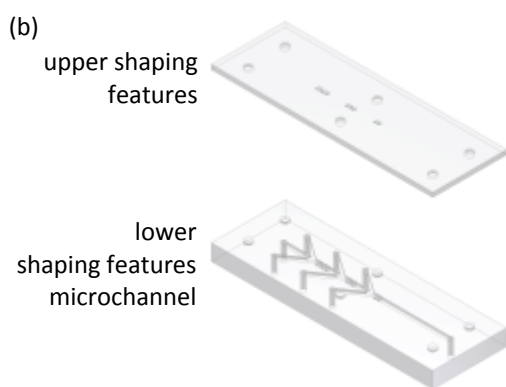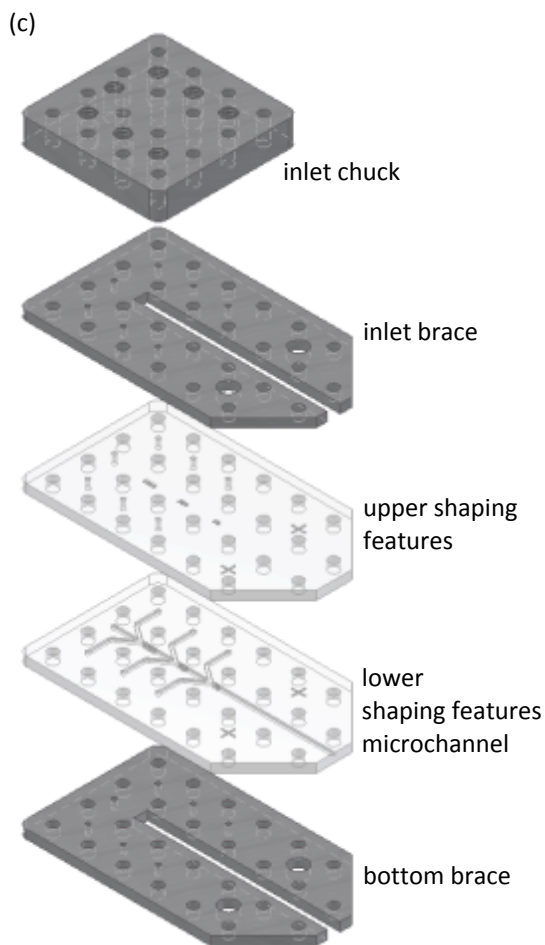

**Figure S2.** (a) Photograph of sheath flow system for generating coaxial fibers. Exploded views of the 4x3x2 (b) confocal and (c) fiber extrusion devices are shown. The devices were used to image triaxial flows via confocal microscopy and to create triaxial microfibers, respectively.
